# Supplementary material for: A Hybrid Machine Learning And Network Analysis Approach Reveals Two Parkinson's Disease Subtypes From 115 RNA-Seq Post-mortem Brain Samples
Source: Preprints.org preprint supplement (doi:10.20944/preprints202201.0348.v1), 2022-01-24
Supplement: Supplementary file 1 [file supplementary]

## Sheet: PDC1vsCTRL
Gene

## Sheet: PDC2vsCTRL
Gene
