# Supplementary material for: A Hybrid Machine Learning And Network Analysis Approach Reveals Two Parkinson's Disease Subtypes From 115 RNA-Seq Post-mortem Brain Samples
Source: Preprints.org preprint supplement (doi:10.20944/preprints202201.0348.v1), 2022-01-24
Supplement: Supplementary file 2 [file ST2.xlsx]

## Sheet: Number of cluster selection
strategy	index	Number_clusters	Value_Index	metric
partitioning	kl	3	7.7181
partitioning	ch	2	256.058
partitioning	hartigan	3	52.8074
partitioning	cindex	2	0.2415
partitioning	db	2	0.8218
partitioning	silhouette	2	0.5082
partitioning	duda	2	1.6254
partitioning	pseudot2	2	-50.4027
partitioning	beale	2	-3948.84
partitioning	ratkowsky	2	0.5215
partitioning	ball	3	317113
partitioning	ptbiserial	2	0.7559
partitioning	gap	2	0.0475
partitioning	frey	2	4.7678
partitioning	mcclain	2	0.2719
partitioning	gamma	2	0.9239
partitioning	gplus	2	185.11
partitioning	tau	2	4492.24
partitioning	dunn	2	0.2259
partitioning	sdindex	2	0.0438
partitioning	sdbw	5	0.3688
hierarchical	kl	2	7.5812	ward.D
hierarchical	kl	2	6.0094	ward.D2
hierarchical	kl	3	21.1649	single
hierarchical	kl	3	13.5348	complete
hierarchical	kl	3	8.4521	average
hierarchical	ch	2	234.679	ward.D
hierarchical	ch	2	234.679	ward.D2
hierarchical	ch	3	10.4894	single
hierarchical	ch	3	172.573	complete
hierarchical	ch	3	144.355	average
hierarchical	hartigan	4	52.1859	ward.D
hierarchical	hartigan	4	29.4302	ward.D2
hierarchical	hartigan	3	19.0127	single
hierarchical	hartigan	3	108.377	complete
hierarchical	hartigan	3	201.535	average
hierarchical	cindex	3	0.1965	ward.D
hierarchical	cindex	2	0.214	ward.D2
hierarchical	cindex	2	0.2993	single
hierarchical	cindex	2	0.3224	complete
hierarchical	cindex	3	0.3022	average
hierarchical	db	2	0.9067	ward.D
hierarchical	db	2	0.9067	ward.D2
hierarchical	db	3	0.7584	single
hierarchical	db	2	0.6876	complete
hierarchical	db	2	0.5145	average
hierarchical	silhouette	2	0.4706	ward.D
hierarchical	silhouette	2	0.4706	ward.D2
hierarchical	silhouette	3	0.1186	single
hierarchical	silhouette	2	0.502	complete
hierarchical	silhouette	2	0.5267	average
hierarchical	ratkowsky	2	0.5102	ward.D
hierarchical	ratkowsky	2	0.5102	ward.D2
hierarchical	ratkowsky	3	0.1737	single
hierarchical	ratkowsky	3	0.4535	complete
hierarchical	ratkowsky	3	0.4368	average
hierarchical	ball	3	296886	ward.D
hierarchical	ball	3	315097	ward.D2
hierarchical	ball	3	576677	single
hierarchical	ball	3	496010	complete
hierarchical	ball	3	900406	average
hierarchical	ptbiserial	2	0.6969	ward.D
hierarchical	ptbiserial	3	0.7118	ward.D2
hierarchical	ptbiserial	3	0.3314	single
hierarchical	ptbiserial	2	0.7094	complete
hierarchical	ptbiserial	3	0.7466	average
hierarchical	gap	2	-0.0003	ward.D
hierarchical	gap	2	-0.0003	ward.D2
hierarchical	gap	3	0.2931	single
hierarchical	gap	2	-0.2298	complete
hierarchical	gap	3	-0.495	average
hierarchical	mcclain	2	0.3444	ward.D
hierarchical	mcclain	2	0.3444	ward.D2
hierarchical	mcclain	2	0.0089	single
hierarchical	mcclain	2	0.1097	complete
hierarchical	mcclain	2	0.0124	average
hierarchical	gamma	2	0.8667	ward.D
hierarchical	gamma	3	0.8947	ward.D2
hierarchical	gamma	3	0.7275	single
hierarchical	gamma	2	0.8658	complete
hierarchical	gamma	4	0.9209	average
hierarchical	gplus	5	327.045	ward.D
hierarchical	gplus	3	270.746	ward.D2
hierarchical	gplus	2	66.2591	single
hierarchical	gplus	2	216.637	complete
hierarchical	gplus	2	35.2298	average
hierarchical	tau	2	4375.31	ward.D
hierarchical	tau	3	4601.58	ward.D2
hierarchical	tau	5	548.368	single
hierarchical	tau	5	4416.04	complete
hierarchical	tau	5	4695.82	average
hierarchical	dunn	4	0.2862	ward.D
hierarchical	dunn	3	0.3239	ward.D2
hierarchical	dunn	3	0.2678	single
hierarchical	dunn	5	0.3381	complete
hierarchical	dunn	4	0.3411	average
hierarchical	sdindex	2	0.0302	ward.D
hierarchical	sdindex	2	0.0297	ward.D2
hierarchical	sdindex	3	0.0256	single
hierarchical	sdindex	2	0.026	complete
hierarchical	sdindex	2	0.0267	average

## Sheet: Evaluation Metrics
type	algorithm	distance_measure	metric	Silh	dunn	avg
Fuzzy clustering	fuzzy_clust	manhattan		0.398961	0.0543771	0.426149
Hierarchical kmeans clustering	Hierarchical_kmeans	manhattan	average	0.398961	0.0543771	0.426149
Hierarchical kmeans clustering	Hierarchical_kmeans	manhattan	centroid	0.398961	0.0543771	0.426149
Hierarchical kmeans clustering	Hierarchical_kmeans	manhattan	complete	0.398961	0.0543771	0.426149
Hierarchical kmeans clustering	Hierarchical_kmeans	manhattan	mcquitty	0.398961	0.0543771	0.426149
Hierarchical kmeans clustering	Hierarchical_kmeans	manhattan	median	0.398961	0.0543771	0.426149
Hierarchical kmeans clustering	Hierarchical_kmeans	manhattan	single	0.398961	0.0543771	0.426149
Hierarchical kmeans clustering	Hierarchical_kmeans	manhattan	ward.D	0.398961	0.0543771	0.426149
Hierarchical kmeans clustering	Hierarchical_kmeans	manhattan	ward.D2	0.398961	0.0543771	0.426149
partitioning clustering	clara	manhattan	average	0.398961	0.0543771	0.426149
partitioning clustering	clara	manhattan	complete	0.398961	0.0543771	0.426149
partitioning clustering	clara	manhattan	single	0.398961	0.0543771	0.426149
partitioning clustering	clara	manhattan	ward.D	0.398961	0.0543771	0.426149
partitioning clustering	clara	manhattan	ward.D2	0.398961	0.0543771	0.426149
partitioning clustering	diana	manhattan	average	0.398961	0.0543771	0.426149
partitioning clustering	diana	manhattan	complete	0.398961	0.0543771	0.426149
partitioning clustering	diana	manhattan	single	0.398961	0.0543771	0.426149
partitioning clustering	diana	manhattan	ward.D	0.398961	0.0543771	0.426149
partitioning clustering	diana	manhattan	ward.D2	0.398961	0.0543771	0.426149
partitioning clustering	kmeans	manhattan	average	0.398961	0.0543771	0.426149
partitioning clustering	kmeans	manhattan	complete	0.398961	0.0543771	0.426149
partitioning clustering	kmeans	manhattan	single	0.398961	0.0543771	0.426149
partitioning clustering	kmeans	manhattan	ward.D	0.398961	0.0543771	0.426149
partitioning clustering	kmeans	manhattan	ward.D2	0.398961	0.0543771	0.426149
partitioning clustering	pam	manhattan	average	0.398961	0.0543771	0.426149
partitioning clustering	pam	manhattan	complete	0.398961	0.0543771	0.426149
partitioning clustering	pam	manhattan	single	0.398961	0.0543771	0.426149
partitioning clustering	pam	manhattan	ward.D	0.398961	0.0543771	0.426149
partitioning clustering	pam	manhattan	ward.D2	0.398961	0.0543771	0.426149
Hierarchical kmeans clustering	Hierarchical_kmeans	canberra	average	0.335766	0.169309	0.420421
Hierarchical kmeans clustering	Hierarchical_kmeans	canberra	centroid	0.335766	0.169309	0.420421
Hierarchical kmeans clustering	Hierarchical_kmeans	canberra	complete	0.335766	0.169309	0.420421
Hierarchical kmeans clustering	Hierarchical_kmeans	canberra	mcquitty	0.335766	0.169309	0.420421
Hierarchical kmeans clustering	Hierarchical_kmeans	canberra	median	0.335766	0.169309	0.420421
Hierarchical kmeans clustering	Hierarchical_kmeans	canberra	single	0.335766	0.169309	0.420421
Hierarchical kmeans clustering	Hierarchical_kmeans	canberra	ward.D	0.335766	0.169309	0.420421
Hierarchical kmeans clustering	Hierarchical_kmeans	canberra	ward.D2	0.335766	0.169309	0.420421
partitioning clustering	clara	canberra	average	0.335766	0.169309	0.420421
partitioning clustering	clara	canberra	complete	0.335766	0.169309	0.420421
partitioning clustering	clara	canberra	single	0.335766	0.169309	0.420421
partitioning clustering	clara	canberra	ward.D	0.335766	0.169309	0.420421
partitioning clustering	clara	canberra	ward.D2	0.335766	0.169309	0.420421
partitioning clustering	diana	canberra	average	0.335766	0.169309	0.420421
partitioning clustering	diana	canberra	complete	0.335766	0.169309	0.420421
partitioning clustering	diana	canberra	single	0.335766	0.169309	0.420421
partitioning clustering	diana	canberra	ward.D	0.335766	0.169309	0.420421
partitioning clustering	diana	canberra	ward.D2	0.335766	0.169309	0.420421
partitioning clustering	kmeans	canberra	average	0.335766	0.169309	0.420421
partitioning clustering	kmeans	canberra	complete	0.335766	0.169309	0.420421
partitioning clustering	kmeans	canberra	single	0.335766	0.169309	0.420421
partitioning clustering	kmeans	canberra	ward.D	0.335766	0.169309	0.420421
partitioning clustering	kmeans	canberra	ward.D2	0.335766	0.169309	0.420421
partitioning clustering	pam	canberra	average	0.335766	0.169309	0.420421
partitioning clustering	pam	canberra	complete	0.335766	0.169309	0.420421
partitioning clustering	pam	canberra	single	0.335766	0.169309	0.420421
partitioning clustering	pam	canberra	ward.D	0.335766	0.169309	0.420421
partitioning clustering	pam	canberra	ward.D2	0.335766	0.169309	0.420421
partitioning clustering	agnes	manhattan	average	0.387773	0.0515351	0.413541
partitioning clustering	agnes	manhattan	complete	0.387773	0.0515351	0.413541
partitioning clustering	agnes	manhattan	ward.D	0.387773	0.0515351	0.413541
partitioning clustering	agnes	manhattan	ward.D2	0.387773	0.0515351	0.413541
partitioning clustering	hclust	manhattan	average	0.387773	0.0515351	0.413541
partitioning clustering	hclust	manhattan	complete	0.387773	0.0515351	0.413541
partitioning clustering	hclust	manhattan	ward.D	0.387773	0.0515351	0.413541
partitioning clustering	hclust	manhattan	ward.D2	0.387773	0.0515351	0.413541
Fuzzy clustering	fuzzy_clust	euclidean		0.350324	0.0842012	0.392425
Hierarchical kmeans clustering	Hierarchical_kmeans	euclidean	average	0.350324	0.0842012	0.392425
Hierarchical kmeans clustering	Hierarchical_kmeans	euclidean	centroid	0.350324	0.0842012	0.392425
Hierarchical kmeans clustering	Hierarchical_kmeans	euclidean	complete	0.350324	0.0842012	0.392425
Hierarchical kmeans clustering	Hierarchical_kmeans	euclidean	mcquitty	0.350324	0.0842012	0.392425
Hierarchical kmeans clustering	Hierarchical_kmeans	euclidean	median	0.350324	0.0842012	0.392425
Hierarchical kmeans clustering	Hierarchical_kmeans	euclidean	single	0.350324	0.0842012	0.392425
Hierarchical kmeans clustering	Hierarchical_kmeans	euclidean	ward.D	0.350324	0.0842012	0.392425
Hierarchical kmeans clustering	Hierarchical_kmeans	euclidean	ward.D2	0.350324	0.0842012	0.392425
Hierarchical kmeans clustering	Hierarchical_kmeans	minkowski	average	0.350324	0.0842012	0.392425
Hierarchical kmeans clustering	Hierarchical_kmeans	minkowski	centroid	0.350324	0.0842012	0.392425
Hierarchical kmeans clustering	Hierarchical_kmeans	minkowski	complete	0.350324	0.0842012	0.392425
Hierarchical kmeans clustering	Hierarchical_kmeans	minkowski	mcquitty	0.350324	0.0842012	0.392425
Hierarchical kmeans clustering	Hierarchical_kmeans	minkowski	median	0.350324	0.0842012	0.392425
Hierarchical kmeans clustering	Hierarchical_kmeans	minkowski	single	0.350324	0.0842012	0.392425
Hierarchical kmeans clustering	Hierarchical_kmeans	minkowski	ward.D	0.350324	0.0842012	0.392425
Hierarchical kmeans clustering	Hierarchical_kmeans	minkowski	ward.D2	0.350324	0.0842012	0.392425
model based clustering	mclust			0.350324	0.0842012	0.392425
partitioning clustering	clara	euclidean	average	0.350324	0.0842012	0.392425
partitioning clustering	clara	euclidean	complete	0.350324	0.0842012	0.392425
partitioning clustering	clara	euclidean	single	0.350324	0.0842012	0.392425
partitioning clustering	clara	euclidean	ward.D	0.350324	0.0842012	0.392425
partitioning clustering	clara	euclidean	ward.D2	0.350324	0.0842012	0.392425
partitioning clustering	clara	minkowski	average	0.350324	0.0842012	0.392425
partitioning clustering	clara	minkowski	complete	0.350324	0.0842012	0.392425
partitioning clustering	clara	minkowski	single	0.350324	0.0842012	0.392425
partitioning clustering	clara	minkowski	ward.D	0.350324	0.0842012	0.392425
partitioning clustering	clara	minkowski	ward.D2	0.350324	0.0842012	0.392425
partitioning clustering	diana	euclidean	average	0.350324	0.0842012	0.392425
partitioning clustering	diana	euclidean	complete	0.350324	0.0842012	0.392425
partitioning clustering	diana	euclidean	single	0.350324	0.0842012	0.392425
partitioning clustering	diana	euclidean	ward.D	0.350324	0.0842012	0.392425
partitioning clustering	diana	euclidean	ward.D2	0.350324	0.0842012	0.392425
partitioning clustering	diana	minkowski	average	0.350324	0.0842012	0.392425
partitioning clustering	diana	minkowski	complete	0.350324	0.0842012	0.392425
partitioning clustering	diana	minkowski	single	0.350324	0.0842012	0.392425
partitioning clustering	diana	minkowski	ward.D	0.350324	0.0842012	0.392425
partitioning clustering	diana	minkowski	ward.D2	0.350324	0.0842012	0.392425
partitioning clustering	kmeans	euclidean	average	0.350324	0.0842012	0.392425
partitioning clustering	kmeans	euclidean	complete	0.350324	0.0842012	0.392425
partitioning clustering	kmeans	euclidean	single	0.350324	0.0842012	0.392425
partitioning clustering	kmeans	euclidean	ward.D	0.350324	0.0842012	0.392425
partitioning clustering	kmeans	euclidean	ward.D2	0.350324	0.0842012	0.392425
partitioning clustering	kmeans	minkowski	average	0.350324	0.0842012	0.392425
partitioning clustering	kmeans	minkowski	complete	0.350324	0.0842012	0.392425
partitioning clustering	kmeans	minkowski	single	0.350324	0.0842012	0.392425
partitioning clustering	kmeans	minkowski	ward.D	0.350324	0.0842012	0.392425
partitioning clustering	kmeans	minkowski	ward.D2	0.350324	0.0842012	0.392425
partitioning clustering	pam	euclidean	average	0.350324	0.0842012	0.392425
partitioning clustering	pam	euclidean	complete	0.350324	0.0842012	0.392425
partitioning clustering	pam	euclidean	single	0.350324	0.0842012	0.392425
partitioning clustering	pam	euclidean	ward.D	0.350324	0.0842012	0.392425
partitioning clustering	pam	euclidean	ward.D2	0.350324	0.0842012	0.392425
partitioning clustering	pam	minkowski	average	0.350324	0.0842012	0.392425
partitioning clustering	pam	minkowski	complete	0.350324	0.0842012	0.392425
partitioning clustering	pam	minkowski	single	0.350324	0.0842012	0.392425
partitioning clustering	pam	minkowski	ward.D	0.350324	0.0842012	0.392425
partitioning clustering	pam	minkowski	ward.D2	0.350324	0.0842012	0.392425
partitioning clustering	agnes	canberra	average	0.32542	0.131001	0.390921
partitioning clustering	agnes	canberra	complete	0.32542	0.131001	0.390921
partitioning clustering	agnes	canberra	ward.D	0.32542	0.131001	0.390921
partitioning clustering	agnes	canberra	ward.D2	0.32542	0.131001	0.390921
partitioning clustering	hclust	canberra	average	0.32542	0.131001	0.390921
partitioning clustering	hclust	canberra	complete	0.32542	0.131001	0.390921
partitioning clustering	hclust	canberra	ward.D	0.32542	0.131001	0.390921
partitioning clustering	hclust	canberra	ward.D2	0.32542	0.131001	0.390921
partitioning clustering	agnes	euclidean	average	0.341375	0.0825402	0.382646
partitioning clustering	agnes	euclidean	complete	0.341375	0.0825402	0.382646
partitioning clustering	agnes	euclidean	ward.D	0.341375	0.0825402	0.382646
partitioning clustering	agnes	euclidean	ward.D2	0.341375	0.0825402	0.382646
partitioning clustering	agnes	minkowski	average	0.341375	0.0825402	0.382646
partitioning clustering	agnes	minkowski	complete	0.341375	0.0825402	0.382646
partitioning clustering	agnes	minkowski	ward.D	0.341375	0.0825402	0.382646
partitioning clustering	agnes	minkowski	ward.D2	0.341375	0.0825402	0.382646
partitioning clustering	hclust	euclidean	average	0.341375	0.0825402	0.382646
partitioning clustering	hclust	euclidean	complete	0.341375	0.0825402	0.382646
partitioning clustering	hclust	euclidean	ward.D2	0.341375	0.0825402	0.382646
partitioning clustering	hclust	minkowski	average	0.341375	0.0825402	0.382646
partitioning clustering	hclust	minkowski	complete	0.341375	0.0825402	0.382646
partitioning clustering	hclust	minkowski	ward.D2	0.341375	0.0825402	0.382646
partitioning clustering	hclust	euclidean	ward.D	0.321578	0.0825402	0.362848
partitioning clustering	hclust	minkowski	ward.D	0.321578	0.0825402	0.362848
partitioning clustering	agnes	binary	single	0.25096	0	0.25096
partitioning clustering	hclust	binary	single	0.25096	0	0.25096
partitioning clustering	agnes	canberra	single	0.039988	0.373302	0.226639
partitioning clustering	hclust	canberra	single	0.039988	0.373302	0.226639
Hierarchical kmeans clustering	Hierarchical_kmeans	maximum	average	0.0479976	0.237573	0.166784
Hierarchical kmeans clustering	Hierarchical_kmeans	maximum	centroid	0.0479976	0.237573	0.166784
Hierarchical kmeans clustering	Hierarchical_kmeans	maximum	complete	0.0479976	0.237573	0.166784
Hierarchical kmeans clustering	Hierarchical_kmeans	maximum	mcquitty	0.0479976	0.237573	0.166784
Hierarchical kmeans clustering	Hierarchical_kmeans	maximum	median	0.0479976	0.237573	0.166784
Hierarchical kmeans clustering	Hierarchical_kmeans	maximum	single	0.0479976	0.237573	0.166784
Hierarchical kmeans clustering	Hierarchical_kmeans	maximum	ward.D	0.0479976	0.237573	0.166784
Hierarchical kmeans clustering	Hierarchical_kmeans	maximum	ward.D2	0.0479976	0.237573	0.166784
partitioning clustering	clara	maximum	average	0.0479976	0.237573	0.166784
partitioning clustering	clara	maximum	complete	0.0479976	0.237573	0.166784
partitioning clustering	clara	maximum	single	0.0479976	0.237573	0.166784
partitioning clustering	clara	maximum	ward.D	0.0479976	0.237573	0.166784
partitioning clustering	clara	maximum	ward.D2	0.0479976	0.237573	0.166784
partitioning clustering	kmeans	maximum	average	0.0479976	0.237573	0.166784
partitioning clustering	kmeans	maximum	complete	0.0479976	0.237573	0.166784
partitioning clustering	kmeans	maximum	single	0.0479976	0.237573	0.166784
partitioning clustering	kmeans	maximum	ward.D	0.0479976	0.237573	0.166784
partitioning clustering	kmeans	maximum	ward.D2	0.0479976	0.237573	0.166784
partitioning clustering	pam	maximum	average	0.0479976	0.237573	0.166784
partitioning clustering	pam	maximum	complete	0.0479976	0.237573	0.166784
partitioning clustering	pam	maximum	single	0.0479976	0.237573	0.166784
partitioning clustering	pam	maximum	ward.D	0.0479976	0.237573	0.166784
partitioning clustering	pam	maximum	ward.D2	0.0479976	0.237573	0.166784
partitioning clustering	hclust	maximum	ward.D	0.0612203	0.208755	0.165598
partitioning clustering	hclust	maximum	ward.D2	0.0612203	0.208755	0.165598
partitioning clustering	diana	binary	average	0.148006	0	0.148006
partitioning clustering	diana	binary	complete	0.148006	0	0.148006
partitioning clustering	diana	binary	single	0.148006	0	0.148006
partitioning clustering	diana	binary	ward.D	0.148006	0	0.148006
partitioning clustering	diana	binary	ward.D2	0.148006	0	0.148006
partitioning clustering	agnes	binary	ward.D	0.133507	0	0.133507
partitioning clustering	agnes	binary	ward.D2	0.133507	0	0.133507
partitioning clustering	hclust	binary	ward.D2	0.133507	0	0.133507
partitioning clustering	agnes	maximum	ward.D	0.028558	0.209145	0.13313
partitioning clustering	agnes	maximum	ward.D2	0.028558	0.209145	0.13313
partitioning clustering	hclust	binary	complete	0.11954	0	0.11954
partitioning clustering	agnes	maximum	complete	0.00152074	0.209266	0.106154
partitioning clustering	hclust	binary	ward.D	0.106129	0	0.106129
partitioning clustering	agnes	binary	complete	0.0932952	0	0.0932952
partitioning clustering	agnes	binary	average	0.0910651	0	0.0910651
partitioning clustering	hclust	binary	average	0.0910651	0	0.0910651
partitioning clustering	hclust	maximum	complete	-0.0679771	0.225894	0.0449697
partitioning clustering	agnes	euclidean	single	-0.0339769	0.1508	0.0414232
partitioning clustering	agnes	minkowski	single	-0.0339769	0.1508	0.0414232
partitioning clustering	hclust	euclidean	single	-0.0339769	0.1508	0.0414232
partitioning clustering	hclust	minkowski	single	-0.0339769	0.1508	0.0414232
partitioning clustering	diana	maximum	average	-0.0942507	0.225894	0.0186961
partitioning clustering	diana	maximum	complete	-0.0942507	0.225894	0.0186961
partitioning clustering	diana	maximum	single	-0.0942507	0.225894	0.0186961
partitioning clustering	diana	maximum	ward.D	-0.0942507	0.225894	0.0186961
partitioning clustering	diana	maximum	ward.D2	-0.0942507	0.225894	0.0186961
partitioning clustering	agnes	manhattan	single	-0.0481195	0.124998	0.0143793
partitioning clustering	hclust	manhattan	single	-0.0481195	0.124998	0.0143793
partitioning clustering	agnes	maximum	single	-0.168057	0.298846	-0.0186344
partitioning clustering	hclust	maximum	single	-0.168057	0.298846	-0.0186344
Hierarchical kmeans clustering	Hierarchical_kmeans	binary	average	-0.020483	0	-0.020483
Hierarchical kmeans clustering	Hierarchical_kmeans	binary	centroid	-0.020483	0	-0.020483
Hierarchical kmeans clustering	Hierarchical_kmeans	binary	complete	-0.020483	0	-0.020483
Hierarchical kmeans clustering	Hierarchical_kmeans	binary	mcquitty	-0.020483	0	-0.020483
Hierarchical kmeans clustering	Hierarchical_kmeans	binary	median	-0.020483	0	-0.020483
Hierarchical kmeans clustering	Hierarchical_kmeans	binary	single	-0.020483	0	-0.020483
Hierarchical kmeans clustering	Hierarchical_kmeans	binary	ward.D	-0.020483	0	-0.020483
Hierarchical kmeans clustering	Hierarchical_kmeans	binary	ward.D2	-0.020483	0	-0.020483
partitioning clustering	clara	binary	average	-0.020483	0	-0.020483
partitioning clustering	clara	binary	complete	-0.020483	0	-0.020483
partitioning clustering	clara	binary	single	-0.020483	0	-0.020483
partitioning clustering	clara	binary	ward.D	-0.020483	0	-0.020483
partitioning clustering	clara	binary	ward.D2	-0.020483	0	-0.020483
partitioning clustering	kmeans	binary	average	-0.020483	0	-0.020483
partitioning clustering	kmeans	binary	complete	-0.020483	0	-0.020483
partitioning clustering	kmeans	binary	single	-0.020483	0	-0.020483
partitioning clustering	kmeans	binary	ward.D	-0.020483	0	-0.020483
partitioning clustering	kmeans	binary	ward.D2	-0.020483	0	-0.020483
partitioning clustering	pam	binary	average	-0.020483	0	-0.020483
partitioning clustering	pam	binary	complete	-0.020483	0	-0.020483
partitioning clustering	pam	binary	single	-0.020483	0	-0.020483
partitioning clustering	pam	binary	ward.D	-0.020483	0	-0.020483
partitioning clustering	pam	binary	ward.D2	-0.020483	0	-0.020483
partitioning clustering	agnes	maximum	average	-0.163199	0.236542	-0.0449276
partitioning clustering	hclust	maximum	average	-0.163199	0.236542	-0.0449276
