# Supplementary material for: A Hybrid Machine Learning And Network Analysis Approach Reveals Two Parkinson's Disease Subtypes From 115 RNA-Seq Post-mortem Brain Samples
Source: Preprints.org preprint supplement (doi:10.20944/preprints202201.0348.v1), 2022-01-24
Supplement: Supplementary file 3 [file ST3.xlsx]

## Sheet: c1_c2
Gene	logFC	AveExpr	t	P.Value	adj.P.Val	B	sig	TF	RIF1	RIF2	HGNC	Entrez	description
ENSG00000142684	2.61654	0.824841	9.35657	6.92222e-16	9.69319e-12	24.4456	Yes	TF	1.13893	-1.20692	ZNF593	51042	zinc finger protein 593 [Source:HGNC Symbol;Acc:HGNC:30943]
ENSG00000105583	3.93559	3.69739	9.00706	4.58003e-15	3.20671e-11	22.7433	Yes	Gene			WDR83OS	51398	WD repeat domain 83 opposite strand [Source:HGNC Symbol;Acc:HGNC:30203]
ENSG00000011052	3.41137	0.52134	8.72656	2.06933e-14	9.65892e-11	21.3819	Yes	Gene			NME1-NME2	654364	NME1-NME2 readthrough [Source:HGNC Symbol;Acc:HGNC:33531]
ENSG00000255633	2.96963	0.723184	8.21674	3.1302e-13	1.0958e-09	18.9246	Yes	Gene			MTRNR2L9		Plays a role as a neuroprotective and antiapoptotic factor.
ENSG00000148671	3.7296	0.965859	8.07124	6.74902e-13	1.89013e-09	18.2285	Yes	Gene			ADIRF	10974	adipogenesis regulatory factor [Source:HGNC Symbol;Acc:HGNC:24043]
ENSG00000213402	2.33772	0.775573	8.03368	8.22486e-13	1.91955e-09	18.0492	Yes	Gene			PTPRCAP	5790	protein tyrosine phosphatase receptor type C associated protein [Source:HGNC Symbol;Acc:HGNC:9667]
ENSG00000213689	2.87108	2.42593	7.7574	3.49547e-12	6.99243e-09	16.7369	Yes	Gene			TREX1	11277	three prime repair exonuclease 1 [Source:HGNC Symbol;Acc:HGNC:12269]
ENSG00000187664	1.46427	-1.15689	7.25523	4.65982e-11	8.15643e-08	14.3846	Yes	Gene			HAPLN4	404037	hyaluronan and proteoglycan link protein 4 [Source:HGNC Symbol;Acc:HGNC:31357]
ENSG00000145029	3.17931	3.76655	6.98843	1.80091e-10	2.80202e-07	13.1556	Yes	Gene			NICN1	84276	nicolin 1 [Source:HGNC Symbol;Acc:HGNC:18317]
ENSG00000213588	2.60836	1.81836	6.83773	3.8325e-10	5.36665e-07	12.4688	Yes	TF	-0.327656	-0.955447	ZBTB9	221504	zinc finger and BTB domain containing 9 [Source:HGNC Symbol;Acc:HGNC:28323]
ENSG00000139574	2.67571	-0.876386	6.63752	1.03471e-09	1.31718e-06	11.5654	Yes	Gene			NPFF	8620	neuropeptide FF-amide peptide precursor [Source:HGNC Symbol;Acc:HGNC:7901]
ENSG00000215472	2.20339	-0.302435	6.46077	2.46131e-09	2.87214e-06	10.7772	Yes	Gene			RPL17-C18orf32	100526842	RPL17-C18orf32 readthrough [Source:HGNC Symbol;Acc:HGNC:44661]
ENSG00000151079	3.50448	3.48838	6.33447	4.54357e-09	4.89412e-06	10.2196	Yes	Gene			KCNA6	3742	potassium voltage-gated channel subfamily A member 6 [Source:HGNC Symbol;Acc:HGNC:6225]
ENSG00000015568	1.90337	1.30993	5.88554	3.83625e-08	3.7026e-05	8.27976	Yes	Gene			RGPD5	84220	RANBP2 like and GRIP domain containing 5 [Source:HGNC Symbol;Acc:HGNC:32418]
ENSG00000264058	1.82325	0.657055	5.87841	3.96622e-08	3.7026e-05	8.24948	Yes	Gene			KRT222		Total amyloid (SNP x SNP interaction) by GWAS CATALOG
ENSG00000178922	1.96705	2.00341	5.71694	8.3803e-08	7.21243e-05	7.56978	Yes	Gene			HYI	81888	hydroxypyruvate isomerase (putative) [Source:HGNC Symbol;Acc:HGNC:26948]
ENSG00000215126	1.53719	0.656102	5.7074	8.75608e-08	7.21243e-05	7.52993	Yes	Gene			CBWD6	644019	COBW domain containing 6 [Source:HGNC Symbol;Acc:HGNC:31978]
ENSG00000177291	0.945106	-0.966148	5.56949	1.64386e-07	0.000127883	6.95794	Yes	Gene			GJD4	219770	gap junction protein delta 4 [Source:HGNC Symbol;Acc:HGNC:23296]
ENSG00000254772	4.33692	1.98336	5.44157	2.92711e-07	0.000215728	6.43431	Yes	Gene			EEF1G	1937	eukaryotic translation elongation factor 1 gamma [Source:HGNC Symbol;Acc:HGNC:3213]
ENSG00000115194	1.96211	4.0338	5.41424	3.308e-07	0.00023161	6.32333	Yes	Gene			SLC30A3	7781	solute carrier family 30 member 3 [Source:HGNC Symbol;Acc:HGNC:11014]
ENSG00000183260	1.22234	-0.151583	5.38709	3.73425e-07	0.000244188	6.2134	Yes	Gene			ABHD16B	140701	abhydrolase domain containing 16B [Source:HGNC Symbol;Acc:HGNC:16128]
ENSG00000187094	1.53639	5.84802	5.38104	3.83641e-07	0.000244188	6.18892	Yes	Gene			CCK	885	cholecystokinin [Source:HGNC Symbol;Acc:HGNC:1569]
ENSG00000237651	1.24994	0.0549826	5.3252	4.91657e-07	0.000299334	5.96396	Yes	Gene			C2orf74	339804	chromosome 2 open reading frame 74 [Source:HGNC Symbol;Acc:HGNC:34439]
ENSG00000254402	2.02763	-0.295334	5.22192	7.74938e-07	0.000452144	5.55155	Yes	Gene			LRRC24	441381	leucine rich repeat containing 24 [Source:HGNC Symbol;Acc:HGNC:28947]
ENSG00000104888	2.80073	7.37309	5.16754	9.82777e-07	0.000550473	5.33631	Yes	Gene			SLC17A7	57030	solute carrier family 17 member 7 [Source:HGNC Symbol;Acc:HGNC:16704]
ENSG00000176020	0.93376	-1.63204	5.09728	1.33304e-06	0.000717946	5.06028	Yes	Gene			AMIGO3	386724	adhesion molecule with Ig like domain 3 [Source:HGNC Symbol;Acc:HGNC:24075]
ENSG00000011083	1.0563	5.06181	5.05588	1.59363e-06	0.000826506	4.89867	Yes	Gene			SLC6A7	6534	solute carrier family 6 member 7 [Source:HGNC Symbol;Acc:HGNC:11054]
ENSG00000171532	1.14669	5.00354	4.9994	2.03028e-06	0.00101536	4.67957	Yes	TF	1.19103	-0.49456	NEUROD2	4761	neuronal differentiation 2 [Source:HGNC Symbol;Acc:HGNC:7763]
ENSG00000204172	1.41367	0.553793	4.97826	2.22202e-06	0.00107293	4.59795	Yes	Gene			AGAP9	642517	ArfGAP with GTPase domain, ankyrin repeat and PH domain 9 [Source:HGNC Symbol;Acc:HGNC:23463]
ENSG00000234857	3.51531	1.62063	4.9463	2.54571e-06	0.00118825	4.47498	Yes	Gene			HNRNPUL2		Nonsense-mediated mRNA decay (NMD) Candidate alsorare movement disorders
ENSG00000270181	2.84252	0.096983	4.78236	5.07258e-06	0.00223332	3.8521	Yes	Gene			BIVM-ERCC5	100533467	BIVM-ERCC5 readthrough [Source:HGNC Symbol;Acc:HGNC:43690]
ENSG00000186891	0.930836	-0.741273	4.77375	5.25769e-06	0.00223332	3.81975	Yes	Gene			TNFRSF18	8784	TNF receptor superfamily member 18 [Source:HGNC Symbol;Acc:HGNC:11914]
ENSG00000162992	1.49192	1.76735	4.7735	5.26312e-06	0.00223332	3.81882	Yes	TF	-0.513312	0.813186	NEUROD1	4760	neuronal differentiation 1 [Source:HGNC Symbol;Acc:HGNC:7762]
ENSG00000270800	2.58841	0.292943	4.66265	8.318e-06	0.00342579	3.40593	Yes	Gene			RPS10-NUDT3	100529239	RPS10-NUDT3 readthrough [Source:HGNC Symbol;Acc:HGNC:49181]
ENSG00000260238	1.71793	0.213744	4.64738	8.85492e-06	0.00354273	3.34954	Yes	Gene			PMF1-BGLAP	100527963	PMF1-BGLAP readthrough [Source:HGNC Symbol;Acc:HGNC:42953]
ENSG00000099977	1.6874	1.7121	4.55579	1.28505e-05	0.00499847	3.01404	Yes	Gene			DDT	1652	D-dopachrome tautomerase [Source:HGNC Symbol;Acc:HGNC:2732]
ENSG00000164600	1.81264	3.54169	4.48059	1.73872e-05	0.00658035	2.74194	Yes	TF	-1.37888	0.810211	NEUROD6	63974	neuronal differentiation 6 [Source:HGNC Symbol;Acc:HGNC:13804]
ENSG00000164082	0.519947	4.16597	4.45312	1.94019e-05	0.0071496	2.64334	Yes	Gene			GRM2	2912	glutamate metabotropic receptor 2 [Source:HGNC Symbol;Acc:HGNC:4594]
ENSG00000136535	2.1187	5.11593	4.38652	2.5266e-05	0.00892601	2.40599	Yes	TF	-0.110104	1.03353	TBR1	10716	T-box brain transcription factor 1 [Source:HGNC Symbol;Acc:HGNC:11590]
ENSG00000166947	1.19009	0.908219	4.38421	2.54974e-05	0.00892601	2.3978	Yes	Gene			EPB42	2038	erythrocyte membrane protein band 4.2 [Source:HGNC Symbol;Acc:HGNC:3381]
ENSG00000125931	1.07098	1.04276	4.36837	2.71387e-05	0.00926884	2.34177	Yes	Gene			CITED1	4435	Cbp/p300 interacting transactivator with Glu/Asp rich carboxy-terminal domain 1 [Source:HGNC Symbol;Acc:HGNC:1986]
ENSG00000141668	1.04949	5.44284	4.35983	2.80662e-05	0.0093574	2.31159	Yes	Gene			CBLN2	147381	cerebellin 2 precursor [Source:HGNC Symbol;Acc:HGNC:1544]
